# FinisherSC : A repeat-aware tool for upgrading de-novo assembly using long reads

Ka-Kit Lam<sup>1</sup>, Kurt LaButti<sup>2</sup>, Asif Khalak<sup>3</sup> and David Tse<sup>1,4\*</sup>

<sup>1</sup>Department of Electrical Engineering and Computer Sciences, UC Berkeley

<sup>2</sup>Joint Genome Institute

<sup>3</sup>Pacific Biosciences

<sup>4</sup>Department of Electrical Engineering, Stanford University

Received on XXX; revised on XXX accepted on XXX

Associate Editor: XXXXXXXX

## ABSTRACT

We introduce FinisherSC, which is a repeat-aware and scalable tool for upgrading de-novo assembly using long reads. Experiments with real data suggest that FinisherSC can provide longer and higher quality contigs than existing tools while maintaining high concordance.

**Availability:** The tool and data are available and will be maintained at <http://kakitone.github.io/finishingTool/>

**Contact:** dntse@stanford.edu

## 1 INTRODUCTION

In de-novo assembly pipelines for long reads, reads are often trimmed or thrown away. Moreover, there is no evidence that state-of-the-art assembly pipelines are data-efficient. In this work, we ask whether state-of-the-art assembly pipelines for long reads have already used up all the available information from raw reads to construct assembly of the highest possible quality. To answer this question, we first collect output contigs from the HGAP pipeline and the associated raw reads. Then, we pass them into our tool FinisherSC[6] to see if higher quality assemblies can be consistently obtained after post-processing.

## 2 METHODS

### 2.1 Usage and pipeline

FinisherSC is designed to upgrade de-novo assembly using long reads(e.g. PacBio reads). It is especially suitable for data consisting of a single long reads library. Input to FinisherSC are contigs(contigs.fasta) constructed by an assembler and all the raw reads(raw\_reads.fasta). Output of FinisherSC are upgraded contigs(improved3.fasta) which are expected to be of higher quality than its input (e.g. longer N50, longer longest contigs, fewer number of contigs, high percentage match with reference, high genome fraction, etc). An example use case of FinisherSC is shown in Fig 1. As shown in Fig 1, FinisherSC can be readily incorporated into state-of-the-art assembly pipelines (e.g. PacBio HGAP).

### 2.2 Algorithm and features

The algorithm of FinisherSC is summarized in Fig 1. Detailed description of the algorithm is in the supplementary materials. We summarize the key features of FinisherSC as follows.

- Repeat-aware: FinisherSC uses a repeat-aware rule to define overlap. It uses string graphs to capture overlap information and to handle repeats so that FinisherSC can robustly merge contigs. Moreover, there is an optional component that can resolve long approximate repeats with two copies by using the polymorphisms between them.
- Data-efficient: FinisherSC utilizes ALL the raw reads to perform re-layout. This can fill gaps and improve robustness in handling repeats.
- Scalable: To identify relevant reads for re-layout and refined analysis, FinisherSC first streams raw reads. MUMMER[4] does the core of the sequence alignment. These techniques allow FinisherSC to be easily scalable to high volume of data.

## 3 RESULTS AND DISCUSSION

### 3.1 Experimental evaluation

Raw reads are processed according to the use case in Fig 1. They are first error corrected and then assembled into contigs by an existing pipeline (i.e. HGAP[1]). Afterwards, we upgrade the contigs using FinisherSC. Quast[3] evaluates the quality of various assemblies. The data used for assessment are real PacBio reads. These includes data recently produced at JGI and data available online supporting the HGAP publication. We assess the assembly quality of the contigs coming out from the Celera assembler[7] of HGAP pipeline against the upgraded contigs by FinisherSC. Moreover, we also compare the upgraded contigs by FinisherSC against those upgraded by PBJelly[2]. A summary of the results is shown in Table 1. We find that FinisherSC can upgrade the assembly from HGAP without sacrifice on accuracy. Moreover, the upgraded contigs by FinisherSC are generally of higher quality than those upgraded by PBJelly. This suggests that there is extra information from the reads that is not fully utilized by state-of-the-art assembly pipelines for long reads.

### 3.2 Discussion

Although FinisherSC was originally designed to improve de-novo assembly by long reads, it can also be used to scaffold long contigs(formed by short reads) using long reads. For that use case, we note that the contigs formed by short reads can sometimes have length shorter than the length of a single long read. Therefore, we suggest users to filter out those short contigs before passing them into FinisherSC.

\*to whom correspondence should be addressed

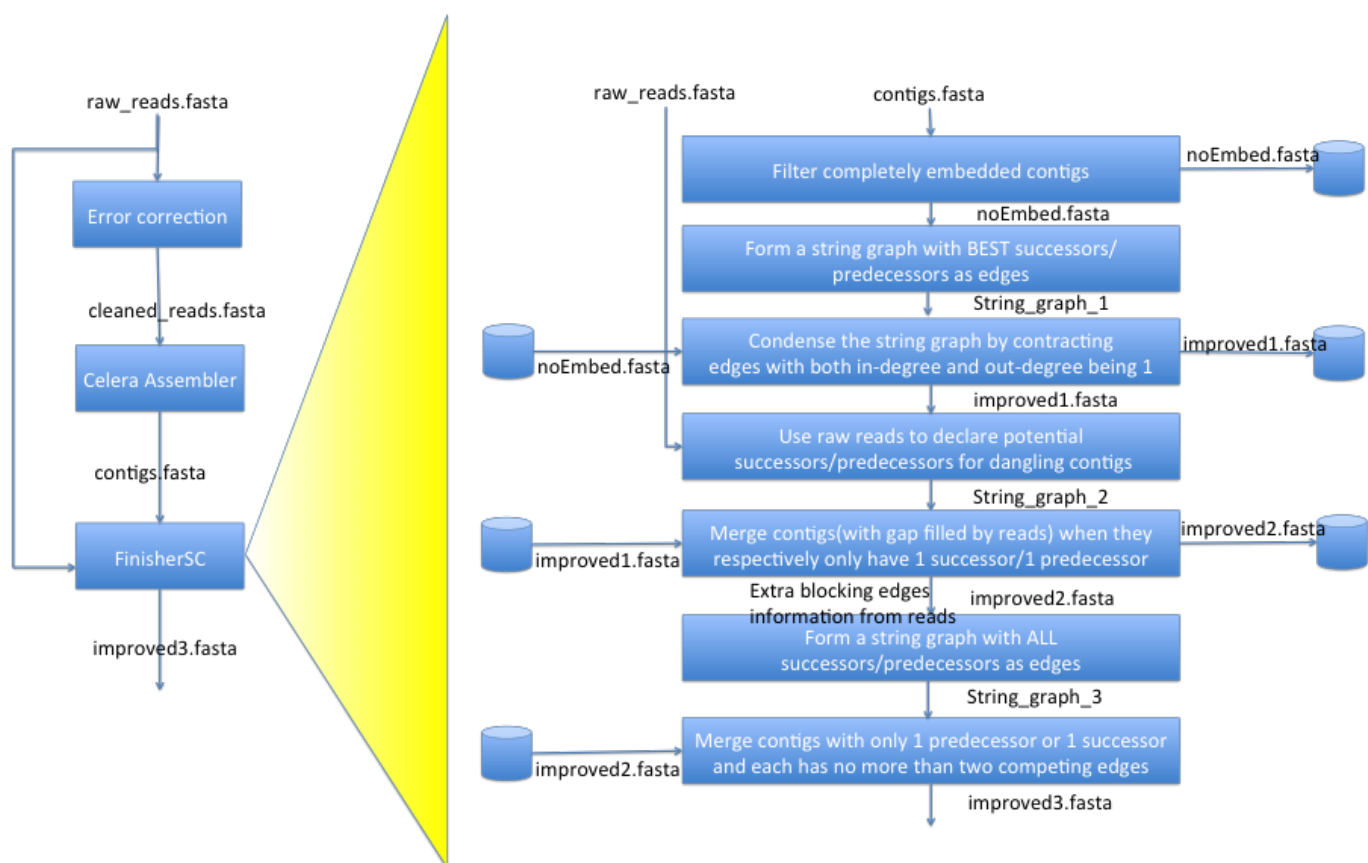

Fig. 1: Pipeline where FinisherSC can fit in

| Genome name                                                      | (a)     | (b)     | (c)     | (d)     | (e)     |
|------------------------------------------------------------------|---------|---------|---------|---------|---------|
| Genome size                                                      | 5167383 | 5167383 | 4639221 | 3097457 | 5167383 |
| Coverage of raw reads                                            | 50      | 30      | 50      | 55      | 53.1    |
| Coverage of corrected reads                                      | 32.93   | 17.74   | 10.1    | 11.3    | 9.5     |
| Coverage of input to Celera                                      | 32.93   | 17.74   | 10.1    | 11.3    | 9.5     |
| N50 of HGAP output                                               | 4097401 | 89239   | 392114  | 1053479 | 1403814 |
| N50 of FinisherSC upgraded output                                | 5168551 | 215810  | 1525398 | 3099349 | 2913716 |
| N50 of PBJelly upgraded output                                   | 4099674 | 145441  | 1200847 | 1715191 | 3343452 |
| Number of contigs of HGAP output                                 | 45      | 163     | 21      | 3       | 18      |
| Number of contigs of FinisherSC upgraded output                  | 4       | 41      | 7       | 1       | 5       |
| Number of contigs of PBJelly upgraded output                     | 44      | 115     | 14      | 2       | 8       |
| Length of the longest contig of HGAP output                      | 4097401 | 254277  | 1241016 | 1390744 | 2103385 |
| Length of the longest contig of FinisherSC upgraded output       | 5168551 | 637485  | 2044060 | 3099349 | 2913716 |
| Length of the longest contig of PBJelly upgraded output          | 4099674 | 495596  | 1958341 | 1715191 | 3343452 |
| Percentage match of HGAP output against reference                | 99.87   | 98.11   | 99.51   | 99.96   | 99.85   |
| Percentage match of FinisherSC upgraded output against reference | 99.87   | 98.27   | 99.60   | 99.99   | 99.89   |
| Percentage match of PBJelly upgraded output against reference    | 99.86   | 98.34   | 92.77   | 99.98   | 99.97   |
| Total length of HGAP output                                      | 5340498 | 5536634 | 4689701 | 3102769 | 5184825 |
| Total length of FinisherSC upgraded output                       | 5212355 | 5139491 | 4660679 | 3099349 | 5167414 |
| Total length of PBJelly upgraded output                          | 5383836 | 5821106 | 4718818 | 3106774 | 5210862 |

**Table 1.** (a, b) : *Pedobacter heparinus* DSM 2366 (recent real long reads from JGI) (c, d, e) : *Escherichia coli* MG 1655, *Meiothermus ruber* DSM 1279, *Pedobacter heparinus* DSM 2366 (real long reads supporting the HGAP publication). Detailed analysis by Quast is shown in the supplementary material.

## 4 SUPPLEMENTARY MATERIALS

### 4.1 Typical use cases

In this section, we describe example use cases of FinisherSC. Below are several scenarios that FinisherSC is helpful to you.

**4.1.1 Low coverage data** There are many reasons that you end up having low coverage reads. You may want to save chemicals, the genome may be too long, some parts of the experimental setup may just malfunction or you do not want to overwhelm the assembler with huge amount of data. In any of these situations, you want to utilize as much information from the reads as possible because of the scarcity of read data.

**4.1.2 Simple setup for assemblers** There are normally a lot of parameters that can be tuned for modern assemblers. It is also often not clear what parameters work best for your data. However, you do not want to waste time in repeatedly running the assembler by varying different combinations of parameters/setting. In this case, you need a tool that can efficiently and automatically improve your assemblies from the raw reads without rerunning the assembler.

**4.1.3 Scaffolding** You may have long contigs prepared from one library and long reads prepared from the other. In this case, you want to robustly and seamlessly combine data from two libraries through scaffolding.

### 4.2 Instructions on using FinisherSC

Our software, FinisherSC, is helpful for the use cases discussed above. It processes long contigs with long reads. You only need to supply the input data files and issue a one-line command as follows to perform the processing. Let us assume that `mumP` is the path to your MUMMER and `destP` is the location where the input and output files stay.

- Input : `raw_reads.fasta`, `contigs.fasta`
- Output : `improved3.fasta`
- Command :  
`python finisherSC.py destP/ mumP/`

We provide a sandbox example in the Dropbox folder linked in our webpage. Besides the standard usage, there is an extra option, which can resolve long approximate repeat with two copies. To experiment with this, you should first run FinisherSC as above and then issue the following command.

`python experimental/newPhasing.py destP/ mumP/`

### 4.3 Detailed description of the algorithm

We adopt the terminology in [5] here. Random flanking region refers to the neighborhood of a repeat interior. A copy of a repeat being bridged means that some reads cover the copy into the random flanking region. Subroutine 1 removes embedded contigs that would otherwise confuse the later string graph operations. Subroutines 2, 3, 6, 7 are designed to handle repeats. Subroutines 2, 3 resolve repeats whose copies are all bridged by some reads. Subroutines 6, 7 resolve two-copies repeats of which only one copy is bridged.

Subroutines 4, 5 utilize neglected information from raw reads. They define merges at locations which are not parts of any long repeats.<sup>1</sup>

---

#### Algorithm 1: Subroutine 1: Filter completely embedded contigs

---

**Input** : `contigs.fasta`

**Output**: `noEmbed.fasta`

1. Obtain alignment among contigs from `contigs.fasta`
  2. For any (x,y) contig pair, if x is completely embedded in y, then we add x to `removeList`
  3. Remove all contigs specified in `removeList` from `contigs.fasta`. The resultant set of contigs are outputted as `noEmbed.fasta`
- 

---

#### Algorithm 2: Subroutine 2: Form a string graph with the BEST successors/predecessors as edges

---

**Input** : `noEmbed.fasta`

**Output**: `String_graph.l`

1. Initialize the nodes of G to be contigs from `noEmbed.fasta`
  2. Obtain alignment among contigs from `noEmbed.fasta`
  3. **for each contig x do**  
Find predecessor y and successor z with the largest overlap with x  
**if such y exists then**  
    add an edge  $y \rightarrow x$  to G  
**if such z exists then**  
    add an edge  $x \rightarrow z$  to G
  4. Output G as `String_graph.l`
- 

---

#### Algorithm 3: Subroutine 3: Condense the string graph by contracting edges with both in-degree and out-degree being 1

---

**Input** : `String_graph.l`, `noEmbed.fasta`

**Output**: `improved1.fasta`

1. **for each edge  $u \rightarrow v$  in `String_graph.l`, do**  
**if  $out-deg(u) = in-deg(v) = 1$  then**  
    condense(u,v) into a single node and concatenate the node labels
  2. **for each node x in the transformed `String_graph.l` do**  
    output the concatenation of contigs associated with node x to be a merged contig
  3. Output all the merged contigs as `improved1.fasta`
- 

<sup>1</sup> To simplify discussion, the subroutines described are based on the assumption that reads are extracted from a single-stranded DNA. However, we remark that we have implemented FinisherSC by taking into account that reads are extracted from both forward and reverse strands.

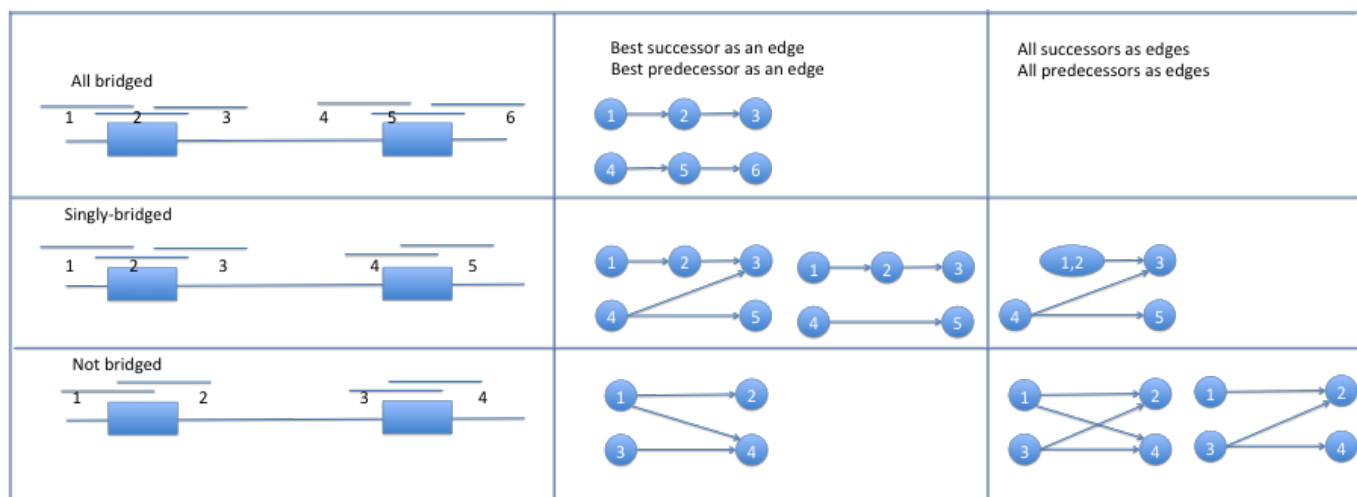

Fig. 2: Repeat patterns, typical String\_graph\_1, typical String\_graph\_3

**Algorithm 4:** Subroutine 4: Use raw reads to declare potential successors/predecessors of dangling contigs

**Input** : improved1.fasta, raw\_reads.fasta

**Output:** String\_graph\_2

1. Initialize nodes of  $G$  to be contigs from improved1.fasta
2. Divide raw\_reads into batches  $B_S$
3. Stream the data in  $B_S$ .  
**for**  $b \in B_S$  **do**
  - i) align  $b$  with contigs from improved1.fasta
  - ii) note down the overlap information in  $I$
4. **for each any pair of nodes**  $u, v$  **in**  $G$  **do**  
**if**  $u \rightarrow v$  **is a predecessor-successor pair then**  
     Add an edge  $u \rightarrow v$  to  $G$   
**if there exists read**  $R$  **such that**  $(u, R)$  **and**  $(R, v)$  **are predecessor-successor pairs according to**  $I$  **then**  
     Add an edge  $u \rightarrow v$  to  $G$
5. Output graph  $G$  as String\_graph\_2

**Algorithm 5:** Subroutine 5: Merge contigs(with gaps filled by reads) when they respectively only have 1 successor/1 predecessor

**Input** : improved1.fasta, String\_graph\_2

**Output:** improved2.fasta, connectivity\_info

1. **for each edge**  $u \rightarrow v$  **of** String\_graph\_2 **do**  
**if**  $\text{out-deg}(u) = \text{in-deg}(v) = 1$  **then**  
     condense( $u, v$ ) into a single node and concatenate the node labels
2. **for each node in the transformed String\_graph\_2 do**  
 output concatenated contigs as new contigs (with reads filling the gaps) and connectivity information to connectivity\_info

**Algorithm 6:** Subroutine 6: Form a string graph with ALL successors/predecessors as edges

**Input** : improved2.fasta, connectivity\_info

**Output:** String\_graph\_3

1. Use connectivity\_info to form a graph  $G$  with nodes from improved2.fasta. All predecessor-successor pairs are edges in  $G$ .
2. Output the corresponding graph as String\_graph\_3

## 4.4 Justification of the algorithm

4.4.1 *Big picture* There are two main parts of the algorithm underlying FinisherSC. They are

1. Gap filling
2. Repeat resolution

With uniform sampling assumption, the gaps are unlikely to land on the few long repeats on bacterial genomes. Therefore, subroutines 4, 5 can close most of the gaps. For repeat resolution, subroutines 1, 2, 3, 6, 7 robustly define merges using various transformations of String graphs. Detailed discussion is in the coming section.

4.4.2 *Detailed justification on repeat resolution* We focus the discussion on a long repeat with two copies. To simplify discussion, we further assume that each base of the genome is covered by some reads and the read length is fixed. The goal here is to correctly merge as many reads as possible in the presence of that repeat. Now, the claim is Subroutine 2, 3, 6, 7 collectively can achieve this goal. Since we focus on one repeat, we only consider the reads either bridging the repeat copies/ reads at the interior of repeats/ touching

**Algorithm 7:** Subroutine 7: Merge contigs with only 1 predecessor or 1 successor and each has no more than two competing edges

**Input :** improved2.fasta, String\_graph\_3

**Output:** improved3.fasta

1. Traverse the String\_graph\_3 for pattern of  $u1 \rightarrow u3$ ,  $u2 \rightarrow u3$ ,  $u2 \rightarrow u4$  and that the out-deg( $u1$ )=1, out-deg( $u2$ )=2, in-deg( $u3$ )=2, in-deg( $u4$ )=1, if found, then,
  - a) Delete the edge  $u2 \rightarrow u3$
  - b) Condense the graph
  - c) Continue until the whole graph is traversed
2. Output the merged contigs as improved3.fasta

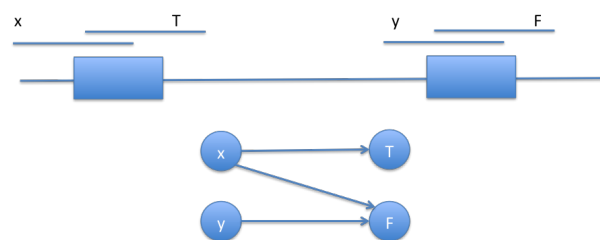

Fig. 3: Zpattern in string graph

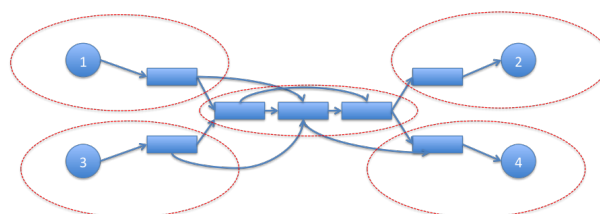

Fig. 4: Using string graph to define repeat interiors and flanking region

the repeat copies for that repeat. We separate the discussion on each of the cases depicted in Fig 2. They are listed as follows.

1. Both copies are bridged
2. Only one copy is bridged
3. Both copies are not bridged

In the first case, without loss of generality, let us consider any read R emerging from the left flanking region of the left copy. It will get merged with its successor when condensing String\_graph\_1. Since R overlaps with its mirror successor through the flanking region, the mirror successor surely will not be declared as R's true successor.

Now, let us move to the second case. Since there is a bridging read, there are no reads completely embedded in the interior of the repeat. Without loss of generality, we consider the case that the left copy is bridged and the right copy is not. Now we label R2 as the bridging read, R1/R3 respectively as the predecessor/successor of the bridging read, R4/R5 as the most penetrating reads into the second copy of the repeat. For all other reads, they get merged with their best successors/predecessors when condensing in String\_graph\_1. For the remaining five items of interest, the main question is whether there is an edge between R4 and R5 in String\_graph\_1 (i.e. whether the best successor of R4 be R3). If not, then condensing in String\_graph\_1 will merge R4 with R5, which is the correct successor. If such an edge exists, then we end up with the pattern shown in Fig 2 for String\_graph\_3. This means that only R1 is merged to R2 when condensing String\_graph\_1. On the other hand, because of the existence of the Z shape pattern, we have R2 merged with R3 and R4 merged with R5 when performing graph operations on String\_graph\_3 by subroutine 7.

Finally, we consider the third case, when both repeat copies are not bridged. For reads that are not closest to the repeat copies, they get merged correctly when condensing String\_graph\_1. Without loss of generality, we consider a read x closest to the left flanking region of the left copy of the repeat. An illustration of this situation in String\_graph\_1 is shown in Fig 3. Let its true successor be T. We are going to show that it will not get merged with the wrong read in String\_graph\_1 through a proof by contradiction. If x got merged with some wrong F, then  $x \rightarrow F$  is an edge. Let y be the read closest to the left flanking region of the right copy of the repeat. Then,  $y \rightarrow F$  is also an edge. Therefore, there should be no merges of  $x \rightarrow F$ , which results in contradiction. Now we consider String\_graph\_3, if x

has only 1 successor, then it should be T. Otherwise, it is connected to both T and some F. Then, we consider the y coming from the left flanking region of the right copy. There must be an edge from y to F. Now, if there is also an edge from y to T, then both x and y are not merged in String\_graph\_3. However, if not, then x is merged with T and y with F, which are the appropriate merges.

#### 4.5 The optional repeat phasing step

In this section, we discuss the optional step on repeat phasing. This involves two main parts. The first one is to utilize string graph to find out repeats and its neighboring random flanking region. It is summarized in Alg 8. An illustration of a typical string graph is shown in Fig 4 where the contigs are indicated by the circles/reads by the rectangles. The dotted line circles specify the random flanking region and repeat interior that we want to infer from the string graph operations in Alg 8. The second one is to utilize the polymorphisms within the repeat copies to help distinguish the repeats. The implementation for the second part is the same as that implemented in [5].

#### 4.6 Future work

FinisherSC is a step forward in utilizing read information. However, there are still many interesting follow up that can further improve quality of assemblies. These include resolution of long tandem repeats and long repeats with many copies.

#### 4.7 Detail experimental results

In this section, we provide the detailed Quast analysis for the results described Table 1. Moreover, we compare in Fig 5 the memory consumption and running time of FinisherSC with PBJelly. The computing experiments were performed at the computing cluster at JGI. We remark that (a) to (e) are the corresponding data sets in Table 1.



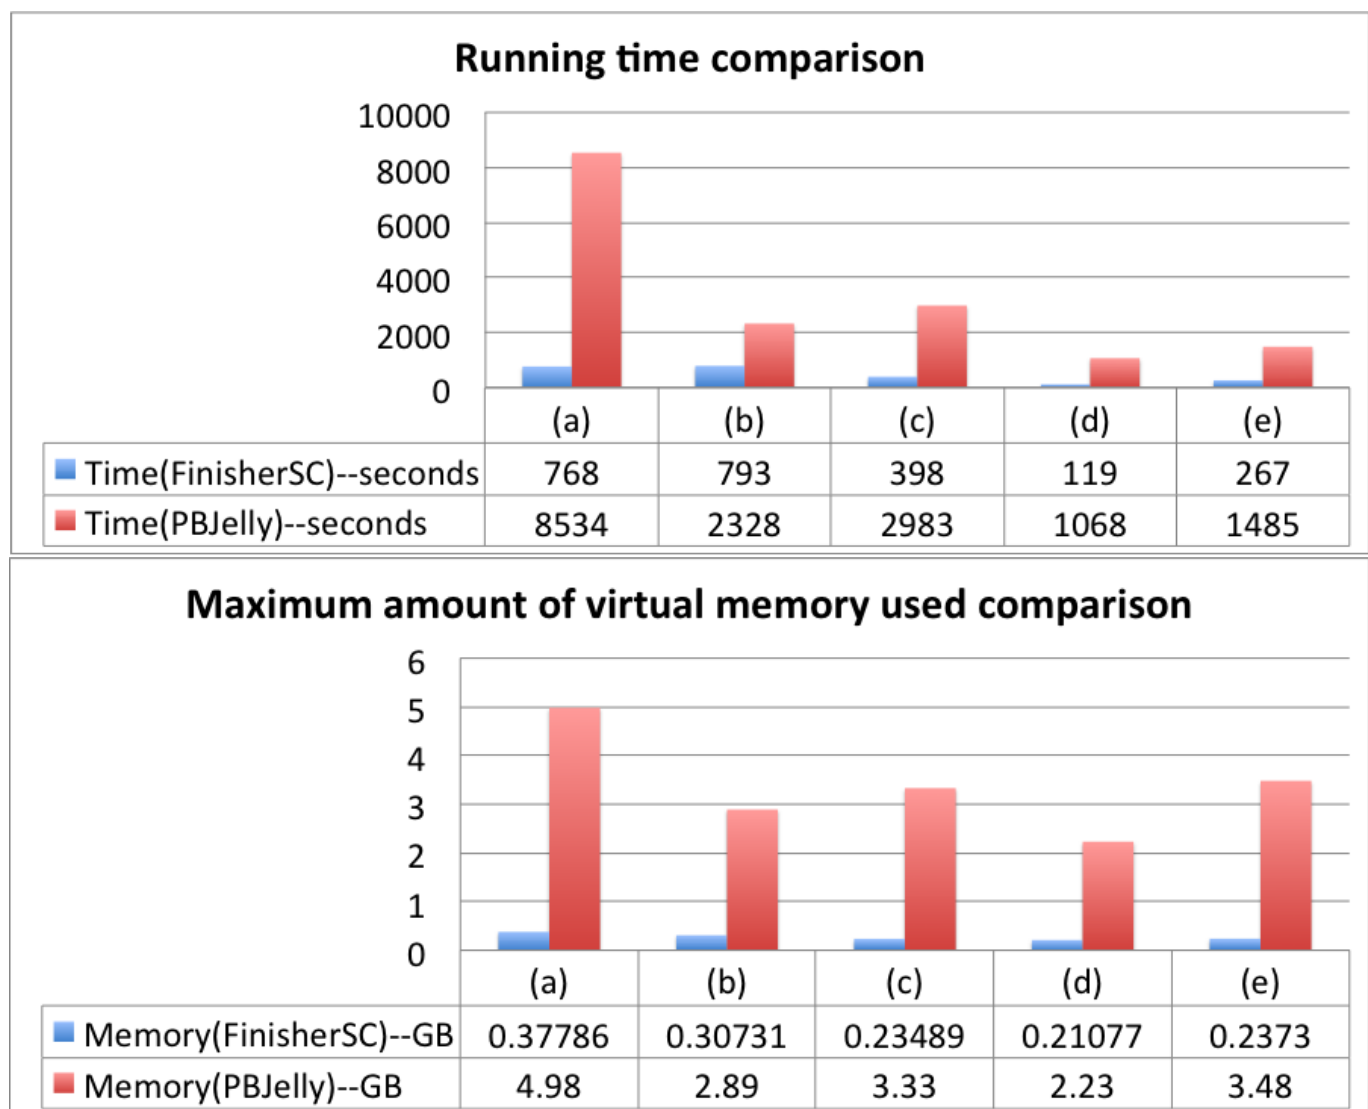

Fig. 5: Running time and memory comparison of FinisherSC and PBJelly . (a) to (e) are the corresponding data sets in Table 1.

## REFERENCES

- [1]Chen-Shan Chin, David H Alexander, Patrick Marks, Aaron A Klammer, James Drake, Cheryl Heiner, Alicia Clum, Alex Copeland, John Huddleston, Evan E Eichler, et al. Nonhybrid, finished microbial genome assemblies from long-read smrt sequencing data. *Nature methods*, 2013.
- [2]Adam C English, Stephen Richards, Yi Han, Min Wang, Vanesa Vee, Jiaxin Qu, Xiang Qin, Donna M Muzny, Jeffrey G Reid, Kim C Worley, et al. Mind the gap: Upgrading genomes with pacific biosciences rs long-read sequencing technology. *PLoS ONE*, 7:47768, 2012.
- [3]Alexey Gurevich, Vladislav Saveliev, Nikolay Vyahhi, and Glenn Tesler. Quast: quality assessment tool for genome assemblies. *Bioinformatics*, 29(8):1072–1075, 2013.
- [4]Stefan Kurtz, Adam Phillippy, Arthur L Delcher, Michael Smoot, Martin Shumway, Corina Antonescu, and Steven L Salzberg. Versatile and open software for comparing large genomes. *Genome biology*, 5(2):R12, 2004.
- [5]Ka-Kit Lam, Asif Khalak, and David Tse. Near-optimal assembly for shotgun sequencing with noisy reads. *BMC Bioinformatics*, 2014.
- [6]Ka-Kit Lam, Kurt LaButti, Asif Khalak, and David Tse. <http://kakitone.github.io/finishingTool/>.
- [7]Eugene W Myers, Granger G Sutton, Art L Delcher, Ian M Dew, Dan P Fasulo, Michael J Flanigan, Saul A Kravitz, Clark M Mobarry, Knut HJ Reinert, Karin A Remington, et al. A whole-genome assembly of drosophila.

### Algorithm 8: Repeat phasing option

**Input** : improved3.fasta, raw\_read.fasta

**Output**: improved4.fasta

1. Stream reads to identify reads that are associated with end points of contigs
2. Form a 2-color graph with black nodes as reads and red nodes as contigs. Name it as  $G$
3. **for each red node in  $G$  do**  
 Perform graph search to determine other red nodes that are reachable by it through path consisting of black nodes only.
4. Form a bipartite graph  $B = (B_L, B_R)$  with nodes on left/right side representing left/right ends of the contigs. An edge  $L \rightarrow R$  exists, where  $L \in B_L, R \in B_R$ , if there exists a path of black nodes in  $G$  such that  $R$  is reachable from  $L$
5. Find connected components in  $B$
6. **for each connected component at  $b \in B$  do**  
**if  $|b \cap B_L| = 2$  and  $|b \cap B_R| = 2$  then**  
     define  $b$  as a two-copies repeat
7. **for each two-copies repeat with associated nodes  $(L1, L2; R1, R2)$  do**  
     a) Go back to graph  $G$ , and label nodes reachable from each of  $L1/L2$  and to each of  $R1/R2$  through black paths.  
     b) For black nodes in  $G$  connected to all  $L1/L2/R1/R2$ , name them as inside nodes. If it only misses one of the four, then label it as miss\_x node where  $x$  is the missed item.  
     c) Define start node  $S$  as an inside node connected to some miss\_L1 nodes and miss\_L2 nodes. Similarly, define end node  $E$  as an inside node connected to some miss\_R1 nodes and miss\_R2 nodes.  
     d) Define repeat interior and flanking region  
     i) Find a black path between  $S$  and  $E$  and label it as repeat path. This is the repeat interior.  
     ii) Find paths from  $L1$  to  $S$ ,  $L2$  to  $S$ ,  $E$  to  $R1$ ,  $E$  to  $R2$  respectively. These are the flanking region.  
     e) For black nodes involved with this repeat,  
     i) If it is connected to nodes on paths  $L1$  to  $S$ , add it to  $L1$  to  $S$  read set. Similarly, do it for  $L2$  to  $S$ ,  $E$  to  $R1$  and  $E$  to  $R2$  read sets.  
     ii) If it is connected to inside nodes only, then add it to repeat read set.  
     iii) Using the separated read sets to perform repeat phasing as described in [5]  
     iv) Declare merging of contigs based on the phasing results.

**Table 2.** (a) in Table 1. All statistics are based on contigs of size  $\geq 500$  bp, unless otherwise noted (e.g., "# contigs ( $\geq 0$  bp)" and "Total length ( $\geq 0$  bp)" include all contigs).

| Assembly                       | HGAP        | FinisherSC        | PBJelly        |
|--------------------------------|-------------|-------------------|----------------|
| # contigs ( $\geq 0$ bp)       | 45          | <b>4</b>          | 44             |
| # contigs ( $\geq 1000$ bp)    | 45          | <b>4</b>          | 44             |
| Total length ( $\geq 0$ bp)    | 5340498     | 5212355           | <b>5383836</b> |
| Total length ( $\geq 1000$ bp) | 5340498     | 5212355           | <b>5383836</b> |
| # contigs                      | 45          | <b>4</b>          | 44             |
| Largest contig                 | 4097401     | <b>5168551</b>    | 4099674        |
| Total length                   | 5340498     | 5212355           | <b>5383836</b> |
| Reference length               | 5167383     | 5167383           | 5167383        |
| GC (%)                         | 42.16       | 42.06             | 42.19          |
| Reference GC (%)               | 42.05       | 42.05             | 42.05          |
| N50                            | 4097401     | <b>5168551</b>    | 4099674        |
| NG50                           | 4097401     | <b>5168551</b>    | 4099674        |
| N75                            | 4097401     | <b>5168551</b>    | 4099674        |
| NG75                           | 4097401     | <b>5168551</b>    | 4099674        |
| L50                            | 1           | 1                 | 1              |
| LG50                           | 1           | 1                 | 1              |
| L75                            | 1           | 1                 | 1              |
| LG75                           | 1           | 1                 | 1              |
| # misassemblies                | <b>1</b>    | <b>1</b>          | 3              |
| # misassembled contigs         | <b>1</b>    | <b>1</b>          | 2              |
| Misassembled contigs length    | <b>9679</b> | <b>9679</b>       | 4117533        |
| # local misassemblies          | <b>2</b>    | 3                 | 4              |
| # unaligned contigs            | 39 + 0 part | <b>1 + 0 part</b> | 39 + 0 part    |
| Unaligned length               | 135514      | <b>17453</b>      | 163702         |
| Genome fraction (%)            | 100.000     | 100.000           | 100.000        |
| Duplication ratio              | 1.007       | <b>1.005</b>      | 1.010          |
| # N's per 100 kbp              | 4.25        | <b>0.48</b>       | 4.46           |
| # mismatches per 100 kbp       | 9.56        | <b>1.30</b>       | 10.14          |
| # indels per 100 kbp           | 92.62       | <b>54.90</b>      | 94.75          |
| Largest alignment              | 4097400     | <b>5168480</b>    | 4098915        |
| NA50                           | 4097400     | <b>5168480</b>    | 4098915        |
| NGA50                          | 4097400     | <b>5168480</b>    | 4098915        |
| NA75                           | 4097400     | <b>5168480</b>    | 4098915        |
| NGA75                          | 4097400     | <b>5168480</b>    | 4098915        |
| LA50                           | 1           | 1                 | 1              |
| LGA50                          | 1           | 1                 | 1              |
| LA75                           | 1           | 1                 | 1              |
| LGA75                          | 1           | 1                 | 1              |

**Table 3.** (b) in Table 1. All statistics are based on contigs of size  $\geq 500$  bp, unless otherwise noted (e.g., "# contigs ( $\geq 0$  bp)" and "Total length ( $\geq 0$  bp)" include all contigs).

| Assembly                       | HGAP          | FinisherSC        | PBJelly        |
|--------------------------------|---------------|-------------------|----------------|
| # contigs ( $\geq 0$ bp)       | 163           | <b>41</b>         | 115            |
| # contigs ( $\geq 1000$ bp)    | 163           | <b>41</b>         | 115            |
| Total length ( $\geq 0$ bp)    | 5536634       | 5139491           | <b>5821106</b> |
| Total length ( $\geq 1000$ bp) | 5536634       | 5139491           | <b>5821106</b> |
| # contigs                      | 163           | <b>41</b>         | 115            |
| Largest contig                 | 254277        | <b>637485</b>     | 495596         |
| Total length                   | 5536634       | 5139491           | <b>5821106</b> |
| Reference length               | 5167383       | 5167383           | 5167383        |
| GC (%)                         | 41.98         | 41.96             | 42.01          |
| Reference GC (%)               | 42.05         | 42.05             | 42.05          |
| N50                            | 89239         | <b>215810</b>     | 145441         |
| NG50                           | 94672         | <b>215810</b>     | 161517         |
| N75                            | 44568         | <b>117879</b>     | 98297          |
| NG75                           | 53723         | <b>117879</b>     | 116800         |
| L50                            | 20            | <b>9</b>          | 14             |
| LG50                           | 18            | <b>9</b>          | 12             |
| L75                            | 42            | <b>17</b>         | 26             |
| LG75                           | 36            | <b>17</b>         | 21             |
| # misassemblies                | <b>0</b>      | <b>0</b>          | 12             |
| # misassembled contigs         | <b>0</b>      | <b>0</b>          | 10             |
| Misassembled contigs length    | <b>0</b>      | <b>0</b>          | 439591         |
| # local misassemblies          | <b>0</b>      | 3                 | 3              |
| # unaligned contigs            | 46 + 1 part   | <b>1 + 0 part</b> | 43 + 22 part   |
| Unaligned length               | 200727        | <b>11862</b>      | 302804         |
| Genome fraction (%)            | 98.727        | 98.957            | <b>99.964</b>  |
| Duplication ratio              | 1.046         | <b>1.003</b>      | 1.068          |
| # N's per 100 kbp              | 15.64         | <b>6.17</b>       | 9.50           |
| # mismatches per 100 kbp       | <b>63.00</b>  | 67.78             | 68.92          |
| # indels per 100 kbp           | <b>577.98</b> | 589.72            | 597.99         |
| Largest alignment              | 254274        | <b>637485</b>     | 495589         |
| NA50                           | 89239         | <b>215810</b>     | 145441         |
| NGA50                          | 94672         | <b>215810</b>     | 161490         |
| NA75                           | 44567         | <b>117879</b>     | 98293          |
| NGA75                          | 50860         | <b>117879</b>     | 115834         |
| LA50                           | 20            | <b>9</b>          | 14             |
| LGA50                          | 18            | <b>9</b>          | 12             |
| LA75                           | 42            | <b>17</b>         | 26             |
| LGA75                          | 36            | <b>17</b>         | 21             |

**Table 4.** (c) in Table 1. All statistics are based on contigs of size  $\geq 500$  bp, unless otherwise noted (e.g., "# contigs ( $\geq 0$  bp)" and "Total length ( $\geq 0$  bp)" include all contigs).

| Assembly                       | HGAP           | FinisherSC        | PBJelly        |
|--------------------------------|----------------|-------------------|----------------|
| # contigs ( $\geq 0$ bp)       | 21             | <b>7</b>          | 14             |
| # contigs ( $\geq 1000$ bp)    | 21             | <b>7</b>          | 14             |
| Total length ( $\geq 0$ bp)    | 4689701        | 4660679           | <b>4718818</b> |
| Total length ( $\geq 1000$ bp) | 4689701        | 4660679           | <b>4718818</b> |
| # contigs                      | 21             | <b>7</b>          | 14             |
| Largest contig                 | 1241016        | <b>2044060</b>    | 1958341        |
| Total length                   | 4689701        | 4660679           | <b>4718818</b> |
| Reference length               | 4639221        | 4639221           | 4639221        |
| GC (%)                         | 50.87          | 50.85             | 50.85          |
| Reference GC (%)               | 50.79          | 50.79             | 50.79          |
| N50                            | 392114         | <b>1525398</b>    | 1200847        |
| NG50                           | 392114         | <b>1525398</b>    | 1200847        |
| N75                            | 252384         | <b>1525398</b>    | 275618         |
| NG75                           | 252384         | <b>1525398</b>    | 321636         |
| L50                            | 3              | <b>2</b>          | <b>2</b>       |
| LG50                           | 3              | <b>2</b>          | <b>2</b>       |
| L75                            | 7              | <b>2</b>          | 4              |
| LG75                           | 7              | <b>2</b>          | 3              |
| # misassemblies                | <b>8</b>       | <b>8</b>          | 12             |
| # misassembled contigs         | 4              | <b>3</b>          | 5              |
| Misassembled contigs length    | <b>2530799</b> | 3584781           | 3672462        |
| # local misassemblies          | <b>3</b>       | <b>3</b>          | 4              |
| # unaligned contigs            | 0 + 1 part     | <b>0 + 0 part</b> | 0 + 3 part     |
| Unaligned length               | 205            | <b>0</b>          | 2605           |
| Genome fraction (%)            | 99.583         | 99.656            | <b>99.689</b>  |
| Duplication ratio              | 1.015          | <b>1.008</b>      | 1.021          |
| # N's per 100 kbp              | 0.00           | 0.00              | 0.00           |
| # mismatches per 100 kbp       | <b>3.66</b>    | 4.61              | 4.11           |
| # indels per 100 kbp           | <b>8.36</b>    | 13.82             | 10.75          |
| Largest alignment              | 683967         | <b>1094192</b>    | 949307         |
| NA50                           | 339478         | <b>860437</b>     | 685586         |
| NGA50                          | 339478         | <b>860437</b>     | 685586         |
| NA75                           | 229039         | <b>378942</b>     | 255377         |
| NGA75                          | 229039         | <b>378942</b>     | 255377         |
| LA50                           | 5              | <b>3</b>          | <b>3</b>       |
| LGA50                          | 5              | <b>3</b>          | <b>3</b>       |
| LA75                           | 9              | <b>5</b>          | 7              |
| LGA75                          | 9              | <b>5</b>          | 7              |



**Table 5.** (d) in Table 1. All statistics are based on contigs of size  $\geq 500$  bp, unless otherwise noted (e.g., "# contigs ( $\geq 0$  bp)" and "Total length ( $\geq 0$  bp)" include all contigs).

| Assembly                       | HGAP        | FinisherSC     | PBJelly        |
|--------------------------------|-------------|----------------|----------------|
| # contigs ( $\geq 0$ bp)       | 3           | <b>1</b>       | 2              |
| # contigs ( $\geq 1000$ bp)    | 3           | <b>1</b>       | 2              |
| Total length ( $\geq 0$ bp)    | 3102769     | 3099349        | <b>3106774</b> |
| Total length ( $\geq 1000$ bp) | 3102769     | 3099349        | <b>3106774</b> |
| # contigs                      | 3           | <b>1</b>       | 2              |
| Largest contig                 | 1390744     | <b>3099349</b> | 1715191        |
| Total length                   | 3102769     | 3099349        | <b>3106774</b> |
| Reference length               | 3097457     | 3097457        | 3097457        |
| GC (%)                         | 63.38       | 63.39          | 63.38          |
| Reference GC (%)               | 63.38       | 63.38          | 63.38          |
| N50                            | 1053479     | <b>3099349</b> | 1715191        |
| NG50                           | 1053479     | <b>3099349</b> | 1715191        |
| N75                            | 1053479     | <b>3099349</b> | 1391583        |
| NG75                           | 1053479     | <b>3099349</b> | 1391583        |
| L50                            | 2           | <b>1</b>       | <b>1</b>       |
| LG50                           | 2           | <b>1</b>       | <b>1</b>       |
| L75                            | 2           | <b>1</b>       | 2              |
| LG75                           | 2           | <b>1</b>       | 2              |
| # misassemblies                | 0           | 0              | 0              |
| # misassembled contigs         | 0           | 0              | 0              |
| Misassembled contigs length    | 0           | 0              | 0              |
| # local misassemblies          | 2           | 2              | 2              |
| # unaligned contigs            | 0 + 0 part  | 0 + 0 part     | 0 + 0 part     |
| Unaligned length               | 0           | 0              | 0              |
| Genome fraction (%)            | 99.966      | <b>99.986</b>  | <b>99.986</b>  |
| Duplication ratio              | 1.002       | <b>1.001</b>   | 1.003          |
| # N's per 100 kbp              | 0.00        | 0.00           | 0.00           |
| # mismatches per 100 kbp       | <b>0.03</b> | 0.26           | 0.10           |
| # indels per 100 kbp           | <b>1.10</b> | 3.87           | 1.32           |
| Largest alignment              | 1390744     | <b>3099004</b> | 1713236        |
| NA50                           | 1053134     | <b>3099004</b> | 1713236        |
| NGA50                          | 1053134     | <b>3099004</b> | 1713236        |
| NA75                           | 1053134     | <b>3099004</b> | 1391558        |
| NGA75                          | 1053134     | <b>3099004</b> | 1391558        |
| LA50                           | 2           | <b>1</b>       | <b>1</b>       |
| LGA50                          | 2           | <b>1</b>       | <b>1</b>       |
| LA75                           | 2           | <b>1</b>       | 2              |
| LGA75                          | 2           | <b>1</b>       | 2              |

**Table 6.** (e) in Table 1. All statistics are based on contigs of size  $\geq 500$  bp, unless otherwise noted (e.g., "# contigs ( $\geq 0$  bp)" and "Total length ( $\geq 0$  bp)" include all contigs).

| Assembly                       | HGAP              | FinisherSC        | PBJelly        |
|--------------------------------|-------------------|-------------------|----------------|
| # contigs ( $\geq 0$ bp)       | 18                | <b>5</b>          | 8              |
| # contigs ( $\geq 1000$ bp)    | 18                | <b>5</b>          | 8              |
| Total length ( $\geq 0$ bp)    | 5184825           | 5167414           | <b>5210862</b> |
| Total length ( $\geq 1000$ bp) | 5184825           | 5167414           | <b>5210862</b> |
| # contigs                      | 18                | <b>5</b>          | 8              |
| Largest contig                 | 2103385           | 2913716           | <b>3343452</b> |
| Total length                   | 5184825           | 5167414           | <b>5210862</b> |
| Reference length               | 5167383           | 5167383           | 5167383        |
| GC (%)                         | 42.05             | 42.05             | 42.07          |
| Reference GC (%)               | 42.05             | 42.05             | 42.05          |
| N50                            | 1403814           | 2913716           | <b>3343452</b> |
| NG50                           | 1403814           | 2913716           | <b>3343452</b> |
| N75                            | 790287            | <b>2225895</b>    | 1814491        |
| NG75                           | 790287            | <b>2225895</b>    | 1814491        |
| L50                            | 2                 | <b>1</b>          | <b>1</b>       |
| LG50                           | 2                 | <b>1</b>          | <b>1</b>       |
| L75                            | 3                 | <b>2</b>          | <b>2</b>       |
| LG75                           | 3                 | <b>2</b>          | <b>2</b>       |
| # misassemblies                | <b>1</b>          | <b>1</b>          | 2              |
| # misassembled contigs         | <b>1</b>          | <b>1</b>          | 2              |
| Misassembled contigs length    | <b>1403814</b>    | 2913716           | 1820739        |
| # local misassemblies          | <b>0</b>          | <b>0</b>          | 1              |
| # unaligned contigs            | <b>0 + 0 part</b> | <b>0 + 0 part</b> | 0 + 3 part     |
| Unaligned length               | <b>0</b>          | <b>0</b>          | 13698          |
| Genome fraction (%)            | 99.900            | 99.934            | <b>99.954</b>  |
| Duplication ratio              | 1.005             | <b>1.001</b>      | 1.007          |
| # N's per 100 kbp              | 0.00              | 0.00              | 0.00           |
| # mismatches per 100 kbp       | 3.41              | 3.56              | <b>2.28</b>    |
| # indels per 100 kbp           | <b>2.91</b>       | 5.31              | 5.21           |
| Largest alignment              | 2103385           | 2225895           | <b>3343452</b> |
| NA50                           | 1259090           | 1656831           | <b>3343452</b> |
| NGA50                          | 1259090           | 1656831           | <b>3343452</b> |
| NA75                           | 790287            | <b>1656831</b>    | 1270970        |
| NGA75                          | 790287            | <b>1656831</b>    | 1270970        |
| LA50                           | 2                 | 2                 | <b>1</b>       |
| LGA50                          | 2                 | 2                 | <b>1</b>       |
| LA75                           | 3                 | <b>2</b>          | <b>2</b>       |
| LGA75                          | 3                 | <b>2</b>          | <b>2</b>       |
